# Supplementary material for: Facile and sensitive chemiluminescence detection of H2O2 and glucose by a gravity/capillary flow and cloth-based low-cost platform
Source: Royal Society of Chemistry journal article supplement (doi:10.1039/c7ra06721f), 2017-01-01
Supplement: c7ra06721f1.pdf [file c7ra06721f1.pdf]

## Electronic Supplementary Information to

# **Facile and sensitive chemiluminescence detection of H<sub>2</sub>O<sub>2</sub> and glucose by a gravity/capillary flow and cloth-based low- cost platform**

Huijie Li, Dan Wang, Cuiling Liu, Rui Liu, Chunsun Zhang\*

MOE Key Laboratory of Laser Life Science & Institute of Laser Life Science, College of  
Biophotonics, South China Normal University, Guangzhou 510631, China

### **\* The contact information of the corresponding authors is:**

Chunsun Zhang, PhD, Professor

MOE Key Laboratory of Laser Life Science & Institute of Laser Life Science,

College of Biophotonics, South China Normal University,

No. 55, Zhongshan Avenue West, Tianhe District,

Guangzhou, 510631,

P.R. China

Tel: +86-20-85217070-8501, Fax: +86-20-85216052

E-mail: zhangcs@scnu.edu.cn; zhangcs\_scnu@126.com

**Table S1. Materials cost estimation for a single H<sub>2</sub>O<sub>2</sub> or glucose assay**

| <b>Material</b>                      | <b>Quantity used per device</b> | <b>Assay cost per device (\$)</b>                                               |
|--------------------------------------|---------------------------------|---------------------------------------------------------------------------------|
| Cotton cloth (\$2.7/m <sup>2</sup> ) | 15.8 cm <sup>2</sup>            | 0.0043                                                                          |
| Solid wax (\$0.02/g)                 | 0.09 g                          | 0.0018                                                                          |
| HRP (\$0.47/mg)                      | 10.5 µg                         | 0.0049                                                                          |
| Luminol (\$11.51/g)                  | 6.2 µg                          | 0.000071                                                                        |
| PIP (\$3.17/g)                       | 1.54 µg                         | 0.0000049                                                                       |
| GOD (\$0.00061/U)                    | 3 U                             | 0.00183                                                                         |
| Total                                |                                 | 0.011 (for H <sub>2</sub> O <sub>2</sub> assay) or 0.013<br>(for glucose assay) |

**Table S2. Related parameters of white cloths with different components**

| <b>Cloth material<sup>a</sup></b> | <b>Weight of cloth</b>     | <b>Weight of meter of thread</b> | <b>per Threads per inch of width</b>   | <b>Thickness (μm)</b> |
|-----------------------------------|----------------------------|----------------------------------|----------------------------------------|-----------------------|
|                                   | <b>(mg/cm<sup>2</sup>)</b> | <b>(mg)</b>                      |                                        |                       |
| Cotton cloth                      | ~10.12                     | ~16.85                           | ~77                                    | ~120                  |
| Linen-silk cloth                  | ~14.80                     | ~18.00                           | ~71                                    | ~200                  |
| Linen cloth                       | ~20.25                     | ~70.69                           | ~41                                    | ~260                  |
| Corduroy cloth                    | ~30.47                     | ~31.58                           | ~74 (crosswise), and<br>~43 (vertical) | ~450                  |

*Note:* <sup>a</sup> these cloth materials were purchased from Guangzhou Haiyin Cloth Confluence Co. Ltd. (Guangzhou, China); Cotton cloth-white plain weave cotton cloth; Linen-silk cloth-white linen-silk blended cloth; Linen cloth-white linen cloth; and Corduroy cloth-white corduroy weave cotton cloth.

**Table S3. Detection of H<sub>2</sub>O<sub>2</sub> in spiked milk samples.**

| <b>[Added]<sup>a</sup> ( mM )</b> | <b>[Detected]<sup>b</sup> ( mM )</b> | <b>RSD<sup>c</sup> (%)</b> | <b>Recovery<sup>d</sup> (%)</b> |
|-----------------------------------|--------------------------------------|----------------------------|---------------------------------|
| 1                                 | 0.9946                               | 3.97                       | 99.46                           |
| 2                                 | 1.9535                               | 2.96                       | 97.68                           |
| 3                                 | 3.1157                               | 5.58                       | 103.86                          |
| 4                                 | 4.1077                               | 5.81                       | 102.69                          |
| 5                                 | 4.834                                | 3.23                       | 96.68                           |

<sup>a</sup> [Added] means the values that were added into the real sample. <sup>b</sup> [Detected] means the amount of H<sub>2</sub>O<sub>2</sub> obtained according to the standard curve equation from five parallel detections. <sup>c</sup> The relative standard deviation (RSD) is calculated from five independent experiments. <sup>d</sup> Recovery means the [Detected]/[Added] ratio. Before the determination, the spiked samples were appropriately diluted with PBS.

**Table S4. Comparison of the presented cloth-based CL and other CL platforms for the H<sub>2</sub>O<sub>2</sub> determination.**

| Device types      | CL reaction systems                                                         | Main apparatus used                                                                                                         | LDR (mM)    | LOD<br>( $\mu$ M) | References |
|-------------------|-----------------------------------------------------------------------------|-----------------------------------------------------------------------------------------------------------------------------|-------------|-------------------|------------|
| Large-size system | Luminol/H <sub>2</sub> O <sub>2</sub> /ferricyanide                         | Spiral flow cell, Peristaltic pump, four three-way solenoid valves, Perspex joint point, electronic circuit, and photodiode | 0.0022-0.45 | 1.8               | [1]        |
| Large-size system | Co(II)/H <sub>2</sub> O <sub>2</sub> /OH <sup>-</sup>                       | Flow CL cell, and Biophysics CL analyzer with PMT detector                                                                  | 0.005-1     | 2.6               | [2]        |
| Large-size system | Luminol/H <sub>2</sub> O <sub>2</sub> /AuNFs                                | Flow injection CL system consisting of a peristaltic pump, a CL detector and a PMT                                          | 0.03-3      | 10                | [3]        |
| Large-size system | Co <sub>3</sub> O <sub>4</sub> -cored CDs/<br>H <sub>2</sub> O <sub>2</sub> | N/A                                                                                                                         | 0.01-1      | 10                | [4]        |
| Large-size system | Luminol/H <sub>2</sub> O <sub>2</sub> /ferricyanide                         | Test tube, measuring cell of an Aminco Chem Glow Photometer, and pulse integrator                                           | 0.02-10     | 20                | [5]        |

|                                      |                                                                       |                                                                                                                                            |          |       |      |
|--------------------------------------|-----------------------------------------------------------------------|--------------------------------------------------------------------------------------------------------------------------------------------|----------|-------|------|
| Large-size system                    | Luminol/H <sub>2</sub> O <sub>2</sub> /HRP                            | Perkin-Elmer fluorescence spectrophotometer                                                                                                | N/A      | 52.2  | [6]  |
|                                      |                                                                       | with PMT detector, and silica fibre                                                                                                        |          |       |      |
| Large-size system                    | Luminol/H <sub>2</sub> O <sub>2</sub> /HRP                            | Perkin-Elmer fluorescence spectrophotometer                                                                                                | 0.1-3    | 670   | [7]  |
|                                      |                                                                       | with PMT detector, and silica fibre                                                                                                        |          |       |      |
| Lab-on-chip<br>(microfluidic) system | CPPO/Cyalume green dye/H <sub>2</sub> O <sub>2</sub> /DMAP            | PDMS chip, syringe pump, spring-loaded probes, and solution-processed thin-film organic photodiodes                                        | 0.01-1   | 10    | [8]  |
| Lab-on-chip<br>(microfluidic) system | Luminol/H <sub>2</sub> O <sub>2</sub> /HRP                            | Single planar EWOD glass chip, photomultiplier, and amplifier circuit                                                                      | 0.01-100 | 10    | [9]  |
| Lab-on-chip<br>(microfluidic) system | Luminol-H <sub>2</sub> O <sub>2</sub> -Co(II)                         | Silicon/glass chip, two syringe pumps, injector valve, fluid/electrical connectors, photodiodes, transconductance amplifier, and voltmeter | 0.1-1    | 100   | [10] |
| Lab-on-chip<br>(microfluidic) system | CPPO/9,10-diphenylanthracene dye /H <sub>2</sub> O <sub>2</sub> /DMAP | PDMS chip, two syringes, syringe pump, thin-film organic photodiodes, and electrometer                                                     | ~1-1000  | ~1000 | [11] |

|                                      |                                            |                                     |         |      |                  |
|--------------------------------------|--------------------------------------------|-------------------------------------|---------|------|------------------|
| Lab-on-chip<br>(microfluidic) system | Luminol/H <sub>2</sub> O <sub>2</sub> /HRP | Wax-patterned cloth, and CCD camera | 0.5-5   | 460  | [12]             |
| Lab-on-chip<br>(microfluidic) system | Luminol/H <sub>2</sub> O <sub>2</sub> /HRP | Wax-patterned cloth, and CCD camera | 0.01-10 | 9.07 | <b>This work</b> |

---

*Note:* CL: chemiluminescence; LDR: linear dynamic range; LOD: limit of detection; Luminol: 3-aminophthalhydrazide; ferricyanide: potassium hexacyanoferrate(III); PMT: photomultiplier tube; AuNFs-flowerlike gold nanostructures; CDs: carbon dots; N/A: not available; HRP: horseradish peroxidase; CPPO: bis(2-carboxypentyloxy-3,5,6-trichlorophenyl) oxalate; Cyalume green dye: 9,10-bis(phenylethynyl)anthracene; DMAP: 4-dimethylaminopyridine; PDMS: poly(dimethyl-siloxane); EWOD: electrowetting-on-dielectrics; and CCD: charge-coupled device.

**Table S5. Comparison of the presented cloth-based CL and other CL platforms for the glucose determination.**

| Device types      | CL reaction systems                                 | Main apparatus used                                                                                                                                           | LDR (mM) | LOD<br>( $\mu$ M) | References |
|-------------------|-----------------------------------------------------|---------------------------------------------------------------------------------------------------------------------------------------------------------------|----------|-------------------|------------|
| Large-size system | Luminol/H <sub>2</sub> O <sub>2</sub> <sup>a</sup>  | Ten-port selection valve, peristaltic pump, optical flow-cell, PMT, and multi-function interface card                                                         | 0.01-1   | 4                 | [13]       |
| Large-size system | Luminol/H <sub>2</sub> O <sub>2</sub> /HRP-AuNPs    | Peristaltic pump, six-way injection valve, U-shaped glass flow cell, and Biophysics CL analyzer with PMT detector                                             | 0.01-1   | 5                 | [14]       |
| Large-size system | Luminol/H <sub>2</sub> O <sub>2</sub> /ferricyanide | Loop-type microdialysis probe, flow-through microdialyzer, microdialysis syringe pump, variable-speed peristaltic pump, eight-channel injector valve, and PMT | 0-14     | 10                | [15]       |
| Large-size system | Luminol/H <sub>2</sub> O <sub>2</sub> /FRP          | Flow cell, and photodiode with preamplifier                                                                                                                   | 0.05-2   | ~10               | [16]       |
| Large-size system | Luminol/H <sub>2</sub> O <sub>2</sub> /ferricyanide | Ten-position valve, peristaltic pump, holding coil, photodiode, and Radiometer chart recorder,                                                                | 0.03-0.6 | 15                | [17]       |

|                                   |                                                     |                                                                                                                                                            |          |     |      |
|-----------------------------------|-----------------------------------------------------|------------------------------------------------------------------------------------------------------------------------------------------------------------|----------|-----|------|
| Large-size system                 | Luminol/H <sub>2</sub> O <sub>2</sub> /HRP/GO       | Flow cell, peristaltic pump, six-way injection valve, Biophysics CL analyzer with PMT detector, and fluorescence spectrophotometer                         | 0.05-5   | 44  | [18] |
| Large-size system                 | Luminol/H <sub>2</sub> O <sub>2</sub> /HRP          | Microdialysis syringe pump, microdialysis probe, peristaltic pump, injection valve, U-shaped glass flow cell, and Biophysics CL analyzer with PMT detector | 0-12     | 50  | [19] |
| Large-size system                 | Luminol/H <sub>2</sub> O <sub>2</sub> /HRP          | CL cuvette, X-Y-t recorder, and PMT                                                                                                                        | 0.2-2    | 120 | [20] |
| Lab-on-chip (microfluidic) system | Luminol/H <sub>2</sub> O <sub>2</sub> /HRP-MNPs     | Microchip, external magnet, vacuum pump, microscope, and luminescence spectrometer with PMT detector,                                                      | 0.02-350 | 5.2 | [21] |
| Lab-on-chip (microfluidic) system | Luminol/H <sub>2</sub> O <sub>2</sub> /ferricyanide | PDMS/glass chip, syringe pump, multi-position selector valve, and PMT                                                                                      | 0.01-5   | 10  | [22] |
| Lab-on-chip                       | Luminol/H <sub>2</sub> O <sub>2</sub> /ferricy      | Glass chip, peristaltic pump, and Biophysics CL analyzer                                                                                                   | 1.1-110  | 100 | [23] |

|                      |                                                |                                                          |          |      |      |
|----------------------|------------------------------------------------|----------------------------------------------------------|----------|------|------|
| (microfluidic) anide |                                                | with PMT detector                                        |          |      |      |
| system               |                                                |                                                          |          |      |      |
| Lab-on-chip          | Luminol/H <sub>2</sub> O <sub>2</sub> /HRP     | PMMA chip, two syringe pumps, microdialysis probe, and   | 0.8-10   | 100  | [24] |
| (microfluidic)       |                                                | Biophysics CL analyzer with PMT detector                 |          |      |      |
| system               |                                                |                                                          |          |      |      |
| Lab-on-chip          | Luminol/H <sub>2</sub> O <sub>2</sub> /HRP     | PDMS/glass chip, two microdialysis syringe pumps, two-   | 2-10     | 230  | [25] |
| (microfluidic)       |                                                | position actuator switching valve, silicon photodiode,   |          |      |      |
| system               |                                                | multifunctional transimpedance amplifier, and multimeter |          |      |      |
| Lab-on-chip          | Rhodanine                                      | Paper chip fabricated by stacking one layer of assembled | 0.42-50  | 140  | [26] |
| (microfluidic)       | derivative/H <sub>2</sub> O <sub>2</sub>       | WCP#1s between two layers of water-impermeable           |          |      |      |
| system               |                                                | single-sided adhesive tape, ultraweak luminescence       |          |      |      |
|                      |                                                | analyzer with PMT detector                               |          |      |      |
| Lab-on-chip          | Luminol/H <sub>2</sub> O <sub>2</sub> /ferricy | Paper chip fabricated by the photolithographical         | ~0.3-1.2 | ~300 | [27] |
| (microfluidic) anide |                                                | patterning or wax-printing technique                     |          |      |      |
| system               |                                                |                                                          |          |      |      |

|                                         |                                            |                                     |         |      |                  |
|-----------------------------------------|--------------------------------------------|-------------------------------------|---------|------|------------------|
| Lab-on-chip<br>(microfluidic)<br>system | Luminol/H <sub>2</sub> O <sub>2</sub> /HRP | Wax-patterned cloth, and CCD camera | 0.1-100 | 94.8 | [28]             |
| Lab-on-chip<br>(microfluidic)<br>system | Luminol/H <sub>2</sub> O <sub>2</sub>      | Wax-patterned cloth, and CCD camera | 0.01-10 | 9.74 | <b>This work</b> |

---

*Note:* <sup>a</sup>: the catalyst is not available; CL: chemiluminescence; LDR: linear dynamic range; LOD: limit of detection; Luminol: 3-aminophthalhydrazide; PMT: photomultiplier tube; HRP-AuNPs: horseradish peroxidase (HRP) absorbed on the surface of gold nanoparticles; ferricyanide: potassium hexacyanoferrate(III); FRP: fungal peroxidase; GO: graphene oxide; HRP-MNPs: HRP immobilized on magnetic nanoparticles; PDMS: poly(dimethyl-siloxane); PMMA: poly(methyl methacrylate); WCP#1: whatman chromatography paper #1; and CCD: charge-coupled device.

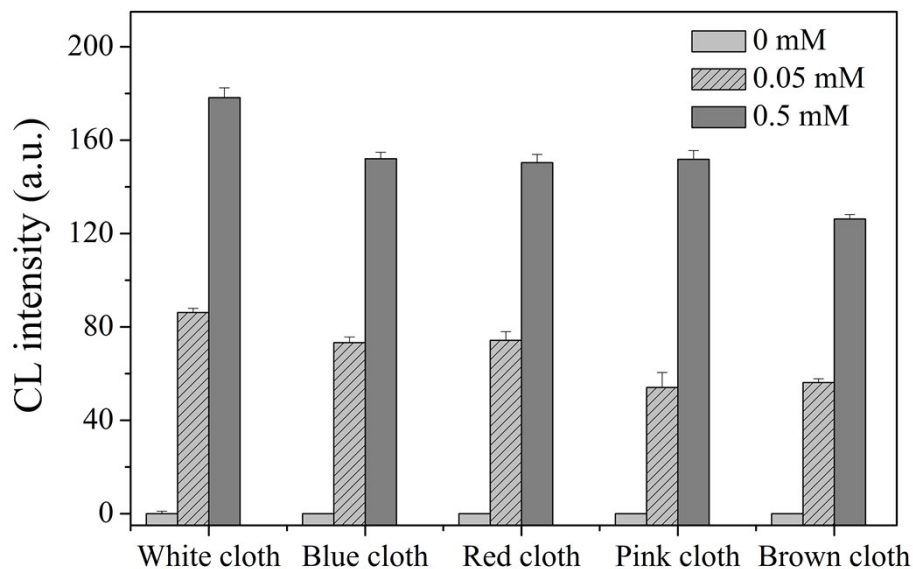

**Fig. S1.** The influence of cloth colors on the CL intensity. Here, the similar cloths had five different colors: white, blue, red, pink, and brown. And, the experimental conditions were as follows: pH of test/substrate solutions-7.5/8.0, [Luminol]-1.0 mM, [HRP]-0.3 g L<sup>-1</sup>, [PIP]-0.2 mM, [H<sub>2</sub>O<sub>2</sub>]-0, 0.05 and 0.5 mM, Angle of inclination-50°, and Volumes of test/substrate solutions-30 μL/35 μL. The error bars represent the standard deviations of five independent measurements.

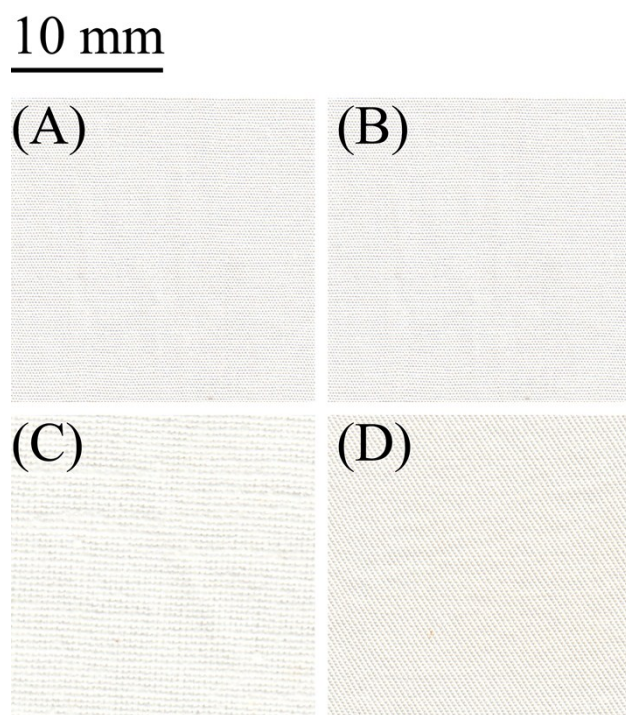

**Fig. S2.** Photos of four kinds of white cloths with different components. **(A)** white plain weave cotton cloth ("Cotton cloth"); **(B)** white linen-silk blended cloth ("Linen-silk cloth"); **(C)** white linen cloth ("Linen cloth"); and **(D)** white corduroy weave cotton cloth ("Corduroy cloth").

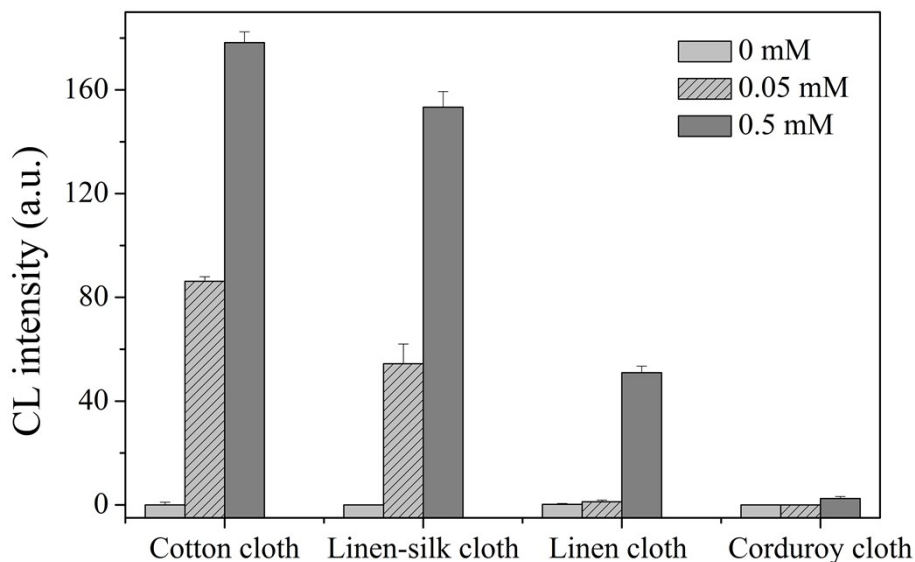

**Fig. S3.** Effect of white cloths with different components on the CL intensity. Here, the used cloth materials included white plain weave cotton cloth ("Cotton cloth"), white linen-silk blended cloth ("Linen-silk cloth"), white linen cloth ("Linen cloth"), and white corduroy weave cotton cloth ("Corduroy cloth"). And, the experimental conditions were as follows: pH of test/substrate solutions-7.5/8.0, [Luminol]-1.0 mM, [HRP]-0.3 g L<sup>-1</sup>, [PIP]-0.2 mM, [H<sub>2</sub>O<sub>2</sub>]-0, 0.05 and 0.5 mM, Angle of inclination-50°, and Volumes of test/substrate solutions-30 μL/35 μL. The error bars represent the standard deviations of five independent measurements.

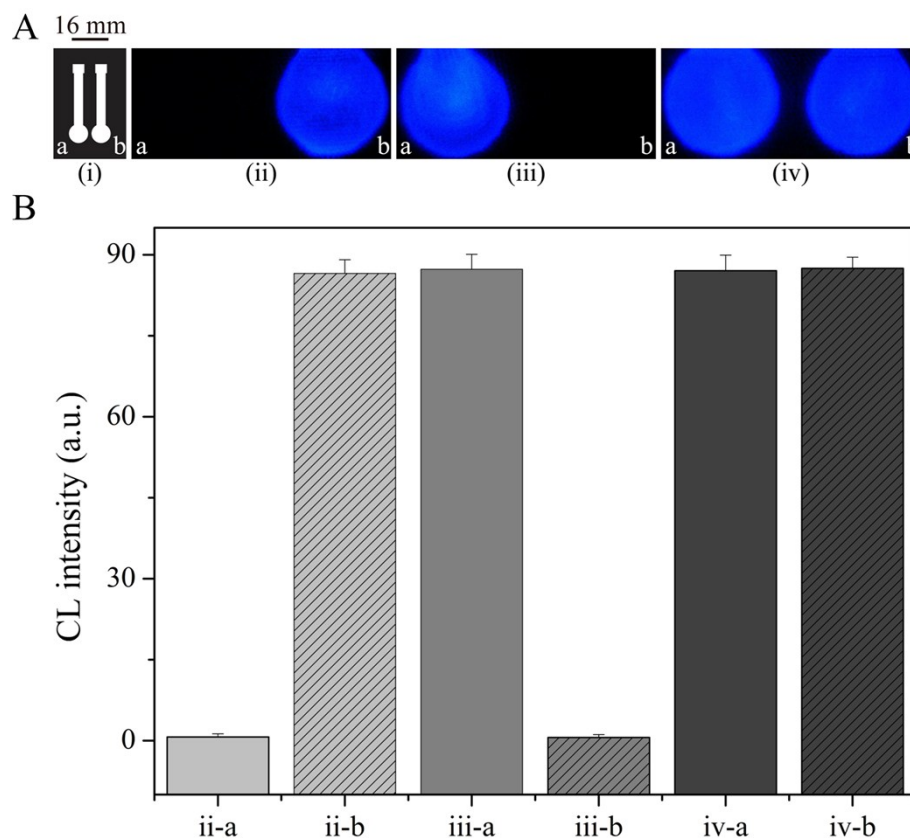

**Fig. S4.** Proof-of-concept demonstration of simultaneous detection within two different CL units on a single cloth piece. **(A)** The typical CL images: (i) the diagram of the device; (ii) the “a” detection zone was loaded with the test solution without H<sub>2</sub>O<sub>2</sub>, while the “b” detection zone was loaded with the H<sub>2</sub>O<sub>2</sub>-containing test solution; (iii) the “a” detection zone was loaded with the H<sub>2</sub>O<sub>2</sub>-containing test solution, while the “b” detection zone was loaded with the test solution without H<sub>2</sub>O<sub>2</sub>; and (iv) the “a” and “b” detection zones were loaded with the H<sub>2</sub>O<sub>2</sub>-containing test solution, respectively. In panels (ii), (iii) and (iv), the experimental conditions were as follows: pH of test/substrate solutions-7.5/8.0, [Luminol]-1.0 mM, [HRP]-0.3 g L<sup>-1</sup>, [PIP]-0.2 mM, [H<sub>2</sub>O<sub>2</sub>]-0.05 mM, Angle of inclination-50°, and Volumes of test/substrate solutions-30 μL/35 μL. **(B)** CL intensities within two detection zones according to the images in panels (ii), (iii) and (iv). The error bars represent the standard deviations of five independent measurements.

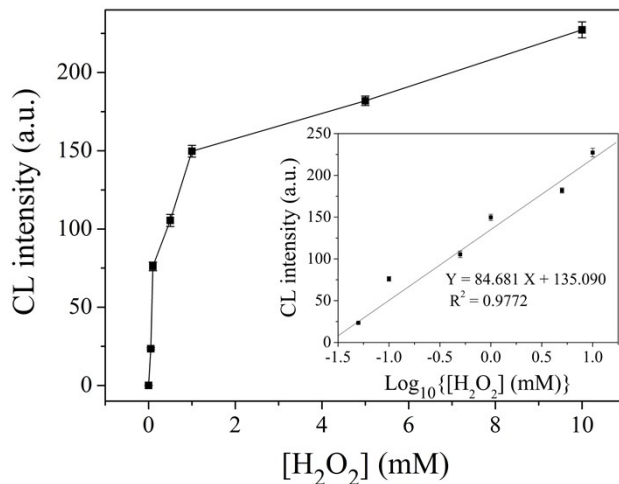

**Fig. S5.** CL determination of H<sub>2</sub>O<sub>2</sub> using the similar paper-based devices. The experimental conditions were as follows: pH of test/substrate solutions-7.5/8.0, [luminol]-1.0 mM, [HRP]-0.3 g L<sup>-1</sup>, [PIP]-0.2 mM, [H<sub>2</sub>O<sub>2</sub>]-0, 0.05, 0.1, 0.5, 1, 5 and 10 mM, Angle of inclination-50°, and Volumes of test/substrate solutions-30 µL/35 µL. The insert showed that the CL intensities could be linearly proportional to the logarithms of H<sub>2</sub>O<sub>2</sub> concentrations in the range of 0.05-10 mM. The error bar represents the standard deviation of five independent measurements.

## References

- 1 O. D. Leite, O. Fatibello, H. J. Vieira, F. R. P. Rocha and N. S. de Miranda Cury, *Anal. Lett.*, 2007, **40**, 3148-3157.
- 2 F. Pan, P. K. Wei, M. L. Zhang and C. Lu, *Anal. Methods*, 2015, **7**, 5667-5673.
- 3 W. Wang and H. Cui, *J. Phys. Chem. C*, 2008, **112**, 10759-10766.
- 4 J. Y. Zhou, J. J. Gu, C. X. Tian, D. C. Jiang, Y. Chen and K. Xi, *RSC Adv.*, 2016, **6**, 39480-39483.
- 5 E. Warm and G. G. Laties, *Phytochemistry*, 1982, **21**, 827-831.
- 6 M. C. Ramos, M. C. Torijas and A. N. Díaz, *Sens. Actuators B*, 2001, **73**, 71-75.
- 7 A. N. Díaz, M. C. R. Peinado and M. C. T. Minguez, *Anal. Chim. Acta*, 1998, **363**, 221-227.
- 8 X. H. Wang, O. Hofmann, R. Das, E. M. Barrett, A. J. deMello, J. C. deMello and D. D. C. Bradley, *Lab Chip*, 2007, **7**, 58-63.
- 9 X. Y. Zeng, K. D. Zhang, J. Pan, G. P. Chen, A. Q. Liu, S. K. Fan and J. Zhou, *Lab Chip*, 2013, **13**, 2714-2720.
- 10 A. M. Jorgensen, K. B. Mogensen, J. P. Kutter and O. Geschke, *Sens. Actuators B*, 2003, **90**, 15-21.
- 11 O. Hofmann, P. Miller, P. Sullivan, T. S. Jones, J. C. deMello, D. D. C. Bradley and A. J. deMello, *Sens. Actuators B*, 2005, **106**, 878-884.
- 12 W. R. Guan, C. S. Zhang, F. F. Liu and M. Liu, *Biosens. Bioelectron.*, 2015, **72**, 114-120.
- 13 P. Panoutsou and A. Economou, *Talanta*, 2005, **67**, 603-609.
- 14 D. Lan, B. X. Li and Z. J. Zhang, *Biosens. Bioelectron.*, 2008, **24**, 934-938.

- 15 Q. Fang, X. T. Shi, Y. Q. Sun and Z. L. Fang, *Anal. Chem.*, 1997, **69**, 3570-3577.
- 16 D. Janasek and U. Spohn, *Sens. Actuators B*, 1997, **38-39**, 291-294.
- 17 X. Z. Liu and E. H. Hansen, *Anal. Chim. Acta*, 1996, **326**, 1-12.
- 18 M. J. Hao, N. Liu and Z. F. Ma, *Analyst*, 2013, **138**, 4393-4397.
- 19 B. X. Li, Z. J. Zhang and Y. Jin, *Anal. Chim. Acta*, 2001, **432**, 95-100.
- 20 Y. X. Li, L. D. Zhu and G. Y. Zhu, *Chem. Res. Chinese U.*, 2002, **18**, 12-15.
- 21 Y. Zheng, S. L. Zhao and Y. M. Liu, *Analyst*, 2011, **136**, 2890-2892.
- 22 Z. R. Xu and Z. L. Fang, *Anal. Chim. Acta*, 2004, **507**, 129-135.
- 23 Y. Lv, Z. J. Zhang and F. N. Chen, *Talanta*, 2003, **59**, 571-576.
- 24 W. Liu, Z. J. Zhang and H. S. Liu, *Anal. Sci.*, 2005, **21**, 413-416.
- 25 B. U. Moon, M. G. de Vries, B. H. C. Westerink and E. Verpoorte, *Sci. China Chem.*, 2012, **55**, 515-523.
- 26 J. H. Yu, L. Ge, J. D. Huang, S. M. Wang and S. G. Ge, *Lab Chip*, 2011, **11**, 1286-1291.
- 27 H. Jang and H. Noh, *Macromol. Res.*, 2015, **23**, 493-495.
- 28 H. J. Li, C. L. Liu, D. Wang and C. S. Zhang, *Biosens. Bioelectron.*, 2017, **91**, 268-275.
